# Supplementary material for: Therapeutic efficacy of the bromodomain inhibitor OTX015/MK-8628 in ALK-positive anaplastic large cell lymphoma: an alternative modality to overcome resistant phenotypes
Source: PubMed Central journal article supplement (PMC5346742; doi:10.18632/oncotarget.12876), 2016-10-25
Supplement: oncotarget-07-79637-s001.pdf [file oncotarget-07-79637-s001.pdf]

## Therapeutic efficacy of the bromodomain inhibitor OTX015/ MK-8628 in ALK-positive anaplastic large cell lymphoma: an alternative modality to overcome resistant phenotypes

### SUPPLEMENTARY FIGURES AND TABLES

A

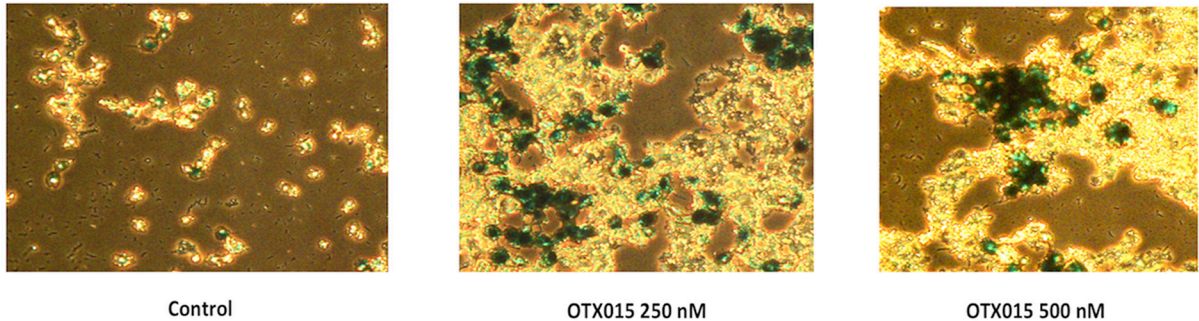

B

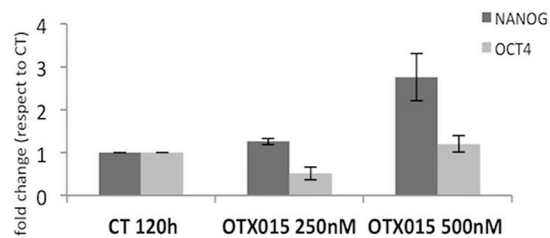

**Supplementary Figure S1: OTX015 displays antiproliferative activity in ALK-positive ALCL *in vitro* models.** **A.** Senescence was evaluated at 120 h post-OTX015 exposure using  $\beta$ -galactosidase staining. **B.** Relative expression of the transcription factors NANOG and OCT4 mRNA in OTX015-treated cells at 120 h post-treatment using RT-PCR. CT, DMSO-treated control.

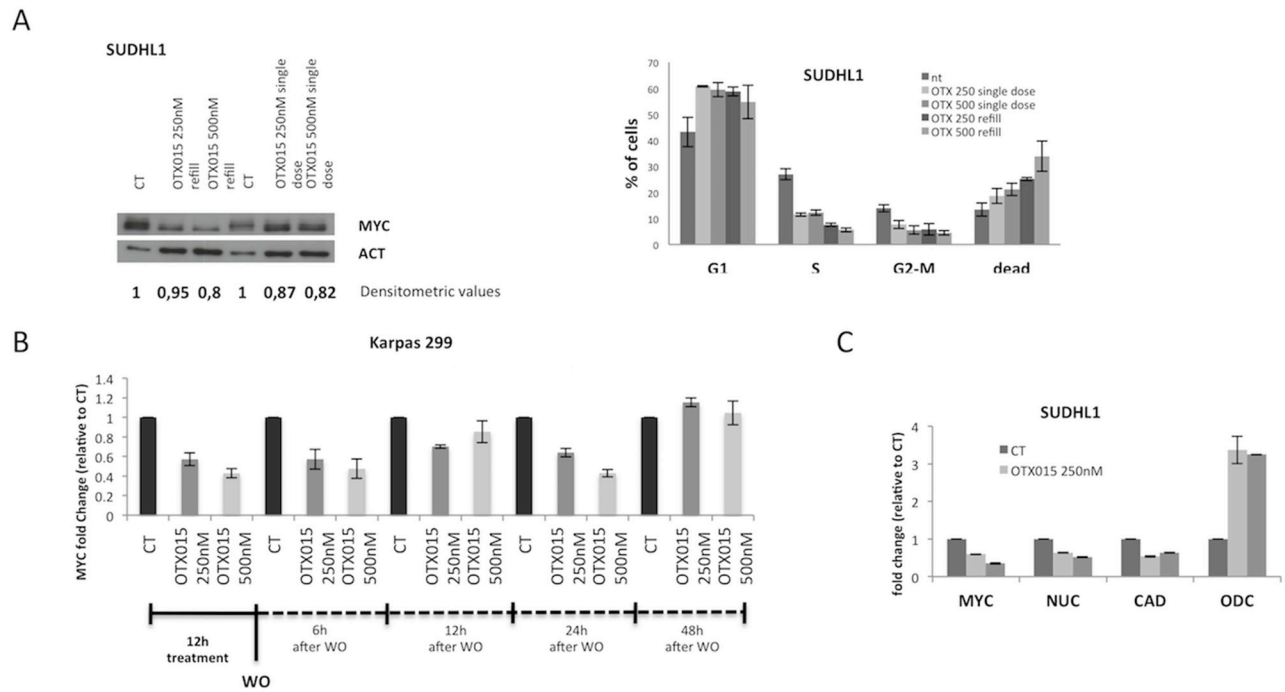

**Supplementary Figure S2: OTX015 modulates MYC expression.** **A.** Repeated OTX015 exposure (every 24 h) and single OTX015 exposure (72 h) gave comparable MYC protein down-regulation and increased accumulation of cells in G1 in cell cycle analysis.  $\beta$ -actin was used as a protein loading control. Densitometry values are indicated. **B.** OTX015 efficiently down-regulated MYC mRNA after a single short exposure. Cells were treated with OTX015 (12 h) and then cultured in complete media without OTX015 for a ‘washout’ period (WO) and harvested (6, 12, 24 and 48 h after washout). MYC mRNA expression was determined (RT-qPCR) and normalized to the GAPDH levels of corresponding samples. Fold-changes relative to control cells are reported. **C.** Changes in CAD, NUC and ODC mRNA expression evaluated by qRT-PCR after 24 h exposure to OTX015 (250 nM and 500 nM).

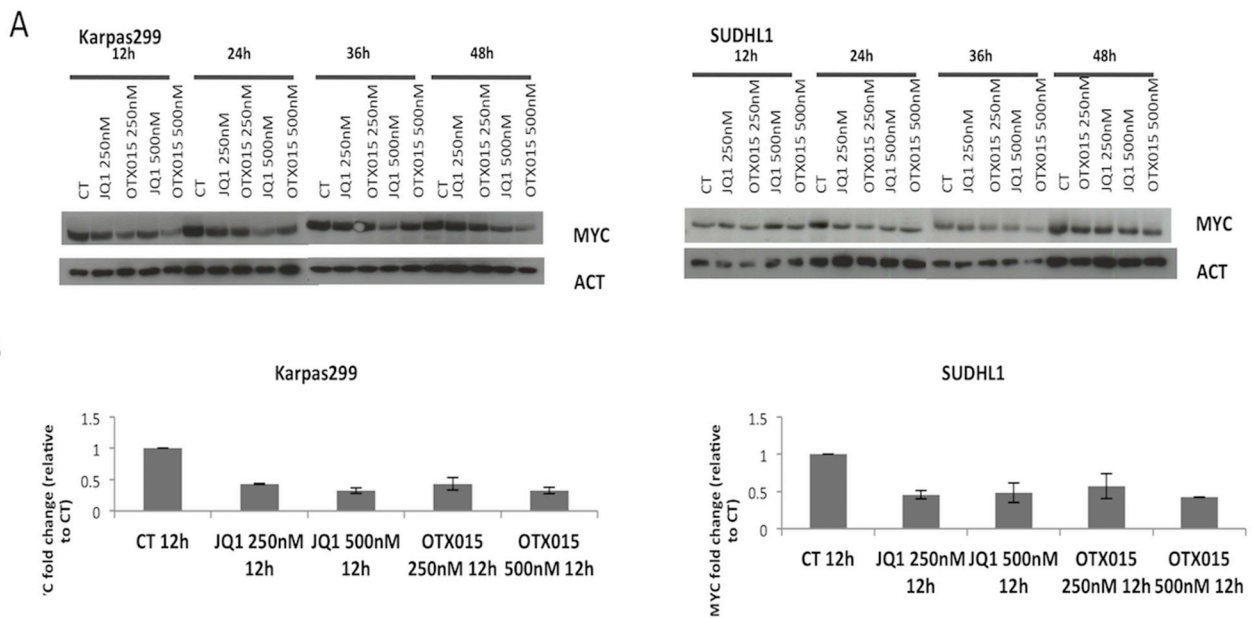

**Supplementary Figure S3: OTX015 has comparable activity to the analog bromodomain inhibitor JQ1.** **A-B.** OTX015 and JQ1 treatment (250 nM and 500 nM for 12, 24, 36 and 48 h) led to similar changes in MYC protein and mRNA expression evaluated by qRT-PCR and Western blot respectively in Karpas299 and SUDHL1 cell lines.

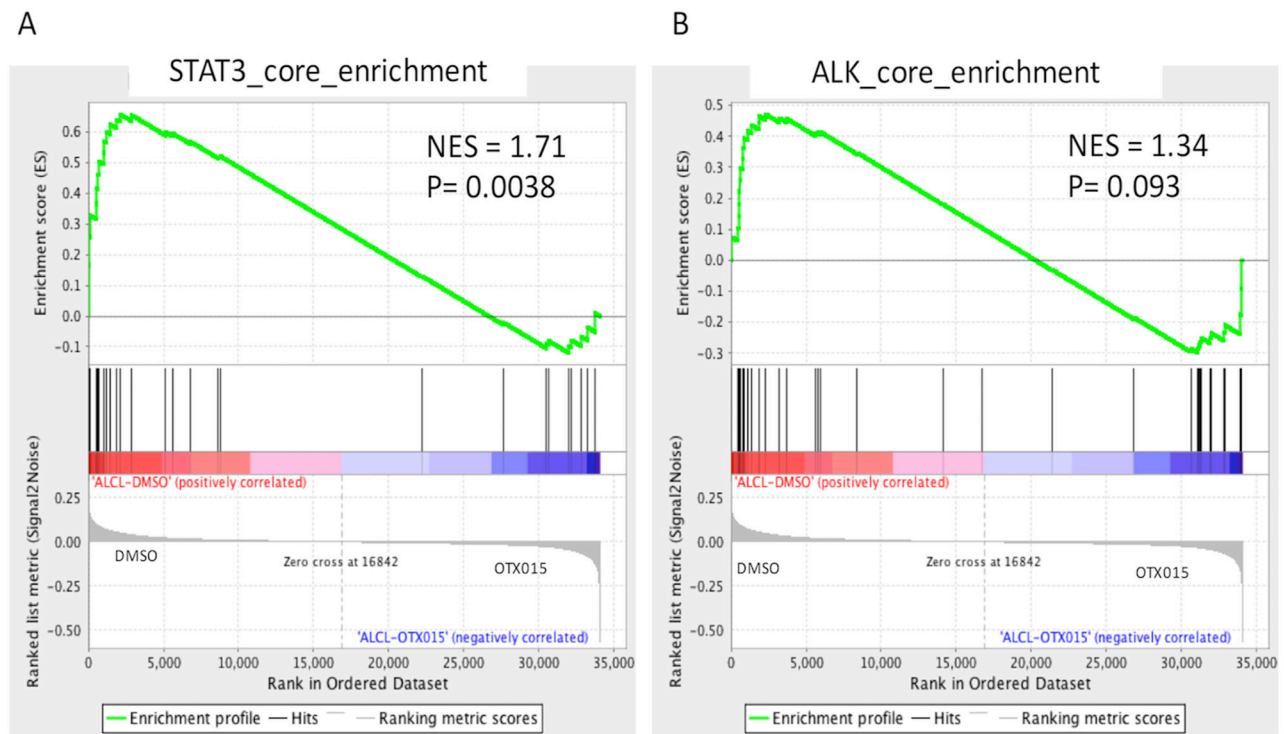

**Supplementary Figure S4: Gene set enrichment analysis of cells treated with OTX015.** Total RNA of the three cell lines was subjected to GEP followed by GSEA. Enrichment plots for gene sets obtained in **A.** from ALCL cells treated with shRNA STAT3 and **B.** from ALCL treated with ALKi or shRNA ALK. NES = normalized enrichment score. Piva R, Agnelli L, Pellegrino E, Todoerti K, Grosso V, Tamagno I, et al. Gene expression profiling uncovers molecular classifiers for the recognition of anaplastic large-cell lymphoma within peripheral T-cell neoplasms. *J Clin Oncol.* 2010;28:1583-90.

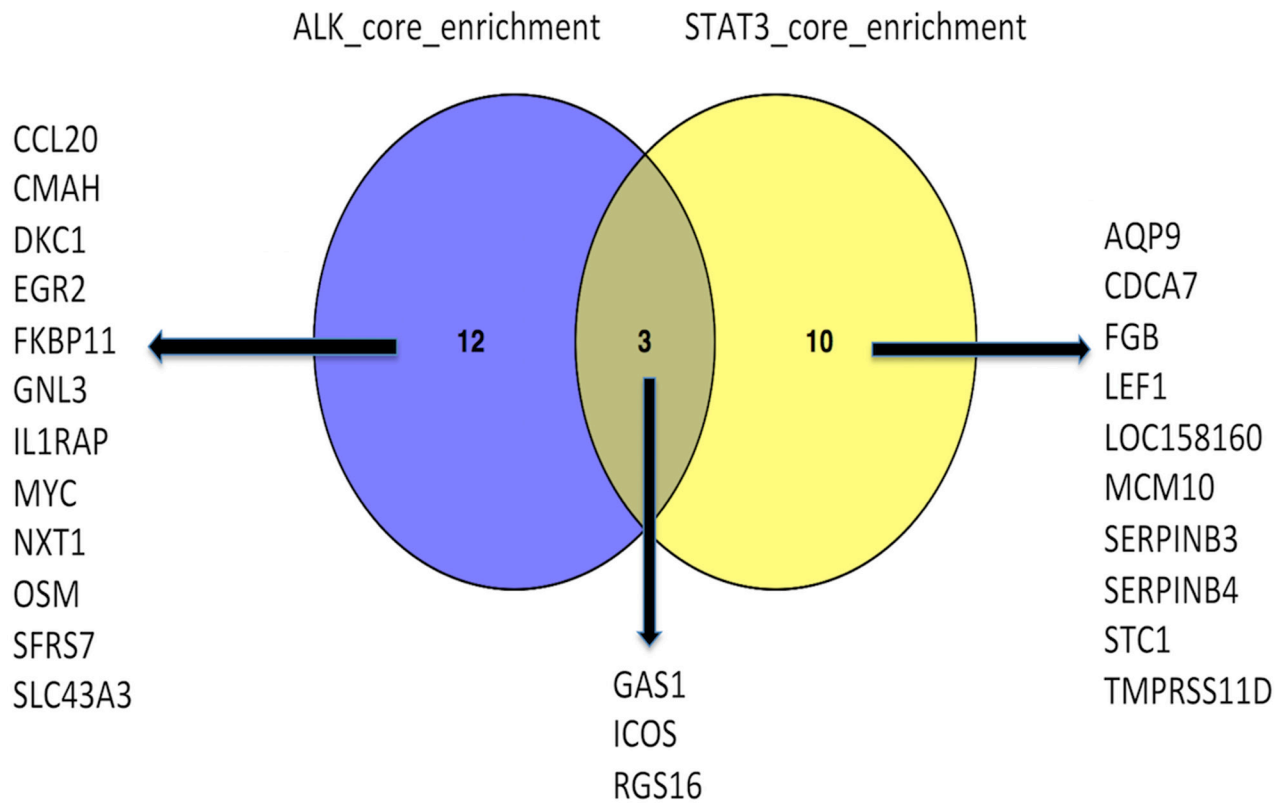

**Supplementary Figure S5: OTX015 modulates a limited number of genes which are controlled via ALK-STAT3 signaling.** Graphic representation of enriched genes after treatment of ALCL cells with 500 nM OTX015 known to be downstream of ALK or STAT3 signaling. Piva R, Agnelli L, Pellegrino E, Todoerti K, Grosso V, Tamagno I, et al. Gene expression profiling uncovers molecular classifiers for the recognition of anaplastic large-cell lymphoma within peripheral T-cell neoplasms. *J Clin Oncol.* 2010;28:1583-90.

**Supplementary Table S1: Sequences of forward (F) and reverse (R) primers used for RT-PCR for BRD and signaling pathway genes**

| Gene    | Primer sequence              |
|---------|------------------------------|
| BRD2-F  | 5'-ACTTGGCCTGCATGACTACC-3'   |
| BRD2-R  | 5'-CTGTAGCTTTCGTGCCATTG-3'   |
| BRD3-F  | 5'-CAACCATCACTGCAAACGTC-3'   |
| BRD3-R  | 5'-GGGAGTGGTTGTGTCTGCTT-3'   |
| BRD4-F  | 5'-AGTCATCCAGCACCACCATT-3'   |
| BRD4-R  | 5'-TCTTAGGCTGGACGTTTTGC-3'   |
| MYC-F   | 5'-GGACCCGCTTCTCTGAAAGG-3'   |
| MYC-R   | 5'-TAACGTTGAGGGGCATCGTC-3'   |
| NUC-F   | 5'-CAGAACCGACTACGGCTTTC-3'   |
| NUC-R   | 5'-ACGCTTCTCCAGGTCTTCA-3'    |
| CAD-F   | 5'-CCCCAGATGAAATGGATGAG-3'   |
| CAD-R   | 5'-CCCGAGTGTCTACTCCTTGC-3'   |
| ODC-F   | 5'-GGTGCCTCCAGAGAGGATTA-3'   |
| ODC-R   | 5'-TGGAATCATCAGTGGCAATC-3'   |
| NANOG-F | 5'-CAATGGTGTGACGCAGAAGG-3'   |
| NANOG-R | 5'-AAGGTTCCCAGTCGGGTTCA-3'   |
| OCT4-F  | 5'-GCCCGAAAGAGAAAGCGAAC-3'   |
| OCT4-R  | 5'-AACCACACTCGGACCACATC-3'   |
| GLI1-F  | 5'-GAAGTCATACTCACGCCTCGAA-3' |
| GLI1-R  | 5'-AGCCAGGGAGCTTACATACAT-3'  |

Supplementary Table S2: Drugs used in the initial screening for synergism assays with OTX015

| Drug             | Target                             |
|------------------|------------------------------------|
| (+)-JQ1          | BET inhibitor                      |
| 17-AAG           | Hsp90 inhibitor                    |
| 17-DMAG          | Hsp90 inhibitor                    |
| 2-DG             | Glycolysis inhibitor               |
| 79-1085          | BCL6 inhibitor                     |
| ABT-737          | Bcl2 inhibitor                     |
| Crizotinib       | ALK inhibitor                      |
| Bendamustine HCl | Alkylating agent                   |
| Bortezomib       | Proteasome inhibitor               |
| BS-181 HCl       | CDK7 inhibitor                     |
| Carfilzomib      | Proteasome inhibitor               |
| VX-765           | Caspases inhibitor                 |
| Cilengitide      | RGD integrin inhibitor             |
| CK37             | Choline Kinase- $\alpha$ Inhibitor |
| Cytarabine       | Antimetabolite agent               |
| Doxorubicin      | anthracycline antibiotics          |
| Gemcitabine      | Antimetabolite agent               |
| GSK-126          | EZH2 inhibitor                     |
| GSK-LSD1         | LSD1 inhibitor                     |
| Imatinib         | c-ABL inhibitor                    |
| Selinexor        | XPO1 inhibitor                     |
| MI-2             | MALT1 inhibitor                    |
| Obatoclax        | Bcl2 inhibitor                     |
| Olaparib         | PARP inhibitor                     |
| Panobinostat     | HDAC inhibitor                     |
| Pralatrexate     | Antimetabolite agent               |
| PU-H71           | Hsp90 inhibitor                    |
| Rapamycin        | mTOR inhibitor                     |
| Ruxolitinib      | JAK1/JAK2 inhibitor                |
| Vorinostat       | HDAC inhibitor                     |
| SNS-032          | CDK7/9 inhibitor                   |
| Tiazofurin       | IMP inhibitor                      |
| TIQ-A            | PARP inhibitor                     |
| Tofacitinib      | JAK3 inhibitor                     |
| TSA              | HDAC class I inhibitor             |
| Withaferin A     | Multiple mechanisms                |
| WS13             | Multiple mechanisms                |
| YK-5             | Hsp70 inhibitor                    |

**Supplementary Table S3: GSEA summary data following 6 h exposure to 500 nM OTX015.**

See Supplementary File 1

**Supplementary Table S4: Ranked\_gene\_list\_ALCL-DMSO\_versus\_ALCL-OTX015 following 6 h exposure to 500 nM OTX015.**

See Supplementary File 2

**Supplementary Table S5: Top 50 modified genes according to GSEA following 6 h exposure to 500 nM OTX015.**

See Supplementary File 3

**Supplementary Table S6: IC50 values were obtained with an MTT assay and Compusyn Analysis of four ALCL cell lines (TS-Supm2, SUDHL1, Karpas299 and DEL) treated with eight drugs as single agents (cilengitide, GSK-LSD1, tofacitinib, bendamustine, ruxolitinib, crizotinib, CEP28122 and GANT61; from 31.25 nM to 10  $\mu$ M; first column per cell line), or in association with 500 nM OTX015 for 72 h (second column per cell line). For several agents, IC50 values were decreased after the combination treatment, suggesting an additive effect of the two drugs.**

See Supplementary File 4
